# Supplementary material
Source: publisher site journal article supplement (https://www.dovepress.com/article/541396)
Supplement: Supplementary file 1 [file 541396%20Supplementary%20Material.doc]

***Supplementary Table 1 The detailed hematological parameters full name and abbreviations***

| Hematological parameters | Abbreviations |
| --- | --- |
| White Blood Cell count | WBC |
| Neutrophil percentage | NEUT % |
| Lymphocyte percentage | LYM % |
| Monocyte percentage | MONO % |
| Eosinophil percentage | EOS % |
| Basophil percentage | BASO % |
| Neutrophil count | NEUT Count |
| Lymphocyte count | LYM Count |
| Monocyte count | MONO Count |
| Eosinophil count | Eos Count |
| Basophil count | BASO Count |
| Red Blood Cell count | RBC |
| Hemoglobin Concentration | HGB |
| Hematocrit | HCT |
| Mean Corpuscular Volume | MCV |
| Mean Corpuscular Hemoglobin | MCH |
| Mean Corpuoscular Hemoglobin Concentration | MCHC |
| Red Blood Cell Distribution Width Standard Deviation | RDWSD |
| Red Blood Cell Distribution Width Coefficient of Variation | RDWCV |
| Platelet count | PLT |
| Mean Platelet Volume | MPV |
| Platelet-large cell ratio | PLCR |
| Plateletcrit | PCT |
| Platelet Distribution Width | PDW |
| High-sensitivity c-reactive protein | HSCRP |
| Total bilirubin | TBIL |
| Direct bilirubin | DBIL |
| Indirect bilirubin | IBIL |
| Alanine aminotransferase | ALT |
| Aspartate aminotransferase | AST |
| AST/ALT | A/A |
| Total Protein | TP |
| Albumin | ALB |
| Globulin | GLB |
| Albumin/globulin | A/G |
| Glutamyl transferase | GGT |
| Alkaline phosphatase | ALP |
| 5'-Nucleotidase | 5’NT |
| Total Bile Acid | TBA |
| Adenosine deaminase | ADA |
| α-L-fucosidase | AFU |
| Blood Uric Acid Uric Acid | UA |
| Cystatin -C | CYSC |
| Creatinine | Crea |
| Urea | Urea |
| Glomerular filtration rate | GFR |
| Blood glucose | GLU |
| Triglycerides | TG |
| Total cholesterol | CHOL |
| High density lipoprotein | HDL |
| Low-Density Lipoprotein Cholesterol | LDLC |
| Apolipoprotein A | APOA |
| Apolipperotein B | APOB |
| Lactate dehydrogenase | LDH |
| Alpha-Hydroxybutyrate dehydrogenase | aHBDH |
| Creatine kinase | CK |
| Creatine kinase-MB | CKMB |
| Kalium | K |
| Sodium | Na |
| Chlorine | CL |
| Calcium | Ca |
| Phosphorus | P |
| Magnesium | Mg |
| Carbon dioxide | CO2 |
| Anion Gap | AG |
| Serum amylase | AMY |
| Alkaline phosphatase | LIP |
| Erythrocyte sedimentation rate | ESR |
| Prothrombin Time | PT |
| International Normalized Ratio | PT INR |
| PT Activity | PT% |
| Activated-partial-thromboplastin-time | APTT |
| Thromboplastin-time | TT |
| Fibrinogen | FIB |
| D-Dimer | DDimer |
| Serum amyloid A | SAA |

***Supplementary Table 2 Missing ratio for each variable***

| Variable | Missing | Non-Missing | P(Missing) |
| --- | --- | --- | --- |
| Gender | 0 | 1030 | 0 |
| Age | 0 | 1030 | 0 |
| MP RNA | 0 | 1030 | 0 |
| WBC | 117 | 913 | 0.1136 |
| NEUT % | 118 | 912 | 0.1146 |
| LYM % | 116 | 914 | 0.1126 |
| MONO % | 119 | 911 | 0.1155 |
| EOS % | 115 | 915 | 0.1117 |
| BASO % | 117 | 913 | 0.1136 |
| NEUT Count | 118 | 912 | 0.1146 |
| LYM Count | 116 | 914 | 0.1126 |
| MONO Count | 119 | 911 | 0.1155 |
| Eos Count | 115 | 915 | 0.1117 |
| BASO Count | 117 | 913 | 0.1136 |
| RBC | 117 | 913 | 0.1136 |
| HGB | 116 | 914 | 0.1126 |
| HCT | 118 | 912 | 0.1146 |
| MCV | 115 | 915 | 0.1117 |
| MCH | 117 | 913 | 0.1136 |
| MCHC | 116 | 914 | 0.1126 |
| RDWSD | 118 | 912 | 0.1146 |
| RDWCV | 115 | 915 | 0.1117 |
| PLT | 117 | 913 | 0.1136 |
| MPV | 116 | 914 | 0.1126 |
| PLCR | 118 | 912 | 0.1146 |
| PCT | 47 | 983 | 0.0456 |
| PDW | 117 | 913 | 0.1136 |
| HSCRP | 148 | 882 | 0.1437 |
| TBIL | 3 | 1027 | 0.0029 |
| DBIL | 2 | 1028 | 0.0019 |
| IBIL | 3 | 1027 | 0.0029 |
| ALT | 4 | 1026 | 0.0039 |
| AST | 3 | 1027 | 0.0029 |
| A/A | 2 | 1028 | 0.0019 |
| TP | 3 | 1027 | 0.0029 |
| ALB | 4 | 1026 | 0.0039 |
| GLB | 3 | 1027 | 0.0029 |
| A/G | 2 | 1028 | 0.0019 |
| GGT | 3 | 1027 | 0.0029 |
| ALP | 2 | 1028 | 0.0019 |
| 5’NT | 4 | 1026 | 0.0039 |
| TBA | 3 | 1027 | 0.0029 |
| ADA | 4 | 1026 | 0.0039 |
| AFU | 3 | 1027 | 0.0029 |
| UA | 4 | 1026 | 0.0039 |
| CYSC | 3 | 1027 | 0.0029 |
| Crea | 4 | 1026 | 0.0039 |
| Urea | 3 | 1027 | 0.0029 |
| GFR | 4 | 1026 | 0.0039 |
| GLU | 149 | 881 | 0.1447 |
| TG | 150 | 880 | 0.1456 |
| CHOL | 151 | 879 | 0.1466 |
| HDL | 148 | 882 | 0.1437 |
| LDLC | 149 | 881 | 0.1447 |
| APOA | 150 | 880 | 0.1456 |
| APOB | 151 | 879 | 0.1466 |
| LDH | 6 | 1024 | 0.0058 |
| aHBDH | 5 | 1025 | 0.0049 |
| CK | 6 | 1024 | 0.0058 |
| CKMB | 5 | 1025 | 0.0049 |
| K | 54 | 976 | 0.0524 |
| Na | 12 | 1018 | 0.0117 |
| CL | 11 | 1019 | 0.0107 |
| Ca | 12 | 1018 | 0.0117 |
| P | 11 | 1019 | 0.0107 |
| Mg | 12 | 1018 | 0.0117 |
| CO2 | 11 | 1019 | 0.0107 |
| AG | 12 | 1018 | 0.0117 |
| AMY | 152 | 878 | 0.1476 |
| LIP | 153 | 877 | 0.1485 |
| ESR | 147 | 883 | 0.1427 |
| PT | 148 | 882 | 0.1437 |
| PT INR | 149 | 881 | 0.1447 |
| PT% | 150 | 880 | 0.1456 |
| APTT | 151 | 879 | 0.1466 |
| TT | 152 | 878 | 0.1476 |
| FIB | 153 | 877 | 0.1485 |
| DDimer | 147 | 883 | 0.1427 |
| SAA | 148 | 882 | 0.1437 |

***Supplementary Table 3* Univariate analysis-Logistic regression *of risk factor of MPP***

| ***Variable*** | ***β*** | ***SE*** | ***Waldχ2*** | ***OR(95CI)*** | ***P*** |
| --- | --- | --- | --- | --- | --- |
| ADA | 0.059 | 0.012 | 22.519 | 1.060(1.035,1.086) | 0.000 |
| APTT | -0.018 | 0.011 | 2.659 | 0.983(0.962,1.004) | 0.103 |
| AST | -0.027 | 0.004 | 36.376 | 0.974(0.965,0.982) | 0.000 |
| Age | 0.250 | 0.024 | 111.423 | 1.284(1.226,1.345) | 0.000 |
| CHOL | 0.074 | 0.046 | 2.576 | 1.077(0.984,1.178) | 0.109 |
| CK | -0.001 | 0.001 | 4.222 | 0.999(0.998,1.000) | 0.040 |
| CKMB | -0.036 | 0.007 | 30.874 | 0.964(0.952,0.977) | 0.000 |
| CL | 0.003 | 0.002 | 1.225 | 1.003(0.998,1.007) | 0.268 |
| CO2 | -0.002 | 0.006 | 0.076 | 0.998(0.987,1.010) | 0.783 |
| CYSC | -1.357 | 0.240 | 32.044 | 0.257(0.161,0.412) | 0.000 |
| Ca | 0.002 | 0.001 | 1.434 | 1.002(0.999,1.004) | 0.231 |
| AFU | -0.051 | 0.007 | 57.769 | 0.950(0.938,0.963) | 0.000 |
| Crea | 0.025 | 0.004 | 38.662 | 1.026(1.017,1.034) | 0.000 |
| DBIL | -0.059 | 0.038 | 2.367 | 0.943(0.874,1.016) | 0.124 |
| DDimer | -0.339 | 0.129 | 6.860 | 0.712(0.553,0.918) | 0.009 |
| ESR | 0.015 | 0.003 | 33.539 | 1.016(1.010,1.021) | 0.000 |
| FIB | 0.423 | 0.065 | 42.173 | 1.526(1.344,1.734) | 0.000 |
| GFR | 0.013 | 0.002 | 31.176 | 1.014(1.009,1.018) | 0.000 |
| GGT | -0.002 | 0.002 | 0.804 | 0.998(0.995,1.002) | 0.370 |
| GLB | 0.116 | 0.015 | 58.324 | 1.123(1.090,1.157) | 0.000 |
| GLU | 0.038 | 0.030 | 1.520 | 1.038(0.978,1.102) | 0.218 |
| HCT | -0.007 | 0.015 | 0.243 | 0.993(0.964,1.022) | 0.622 |
| AG | 0.028 | 0.011 | 6.351 | 1.028(1.006,1.051) | 0.012 |
| HDL | 0.243 | 0.150 | 2.622 | 1.275(0.950,1.712) | 0.105 |
| HGB | -0.002 | 0.004 | 0.235 | 0.998(0.990,1.006) | 0.628 |
| HSCRP | -0.004 | 0.004 | 1.248 | 0.996(0.988,1.003) | 0.264 |
| IBIL | -0.016 | 0.007 | 4.839 | 0.984(0.969,0.998) | 0.028 |
| K | -0.266 | 0.073 | 13.135 | 0.767(0.664,0.885) | 0.000 |
| LDH | -0.003 | 0.001 | 20.203 | 0.997(0.995,0.998) | 0.000 |
| LDLC | 0.120 | 0.075 | 2.525 | 1.127(0.972,1.306) | 0.112 |
| LIP | 0.003 | 0.004 | 0.516 | 1.003(0.995,1.012) | 0.472 |
| MCH | 0.002 | 0.020 | 0.009 | 1.002(0.963,1.042) | 0.926 |
| ALB | -0.000 | 0.009 | 0.003 | 1.000(0.983,1.017) | 0.957 |
| MCHC | -0.004 | 0.003 | 1.544 | 0.996(0.989,1.002) | 0.214 |
| MCV | 0.005 | 0.007 | 0.555 | 1.005(0.991,1.020) | 0.456 |
| MPV | 0.026 | 0.043 | 0.364 | 1.026(0.943,1.117) | 0.546 |
| Mg | -0.134 | 0.168 | 0.641 | 0.874(0.629,1.215) | 0.423 |
| 5’NT | 0.005 | 0.019 | 0.055 | 1.005(0.967,1.043) | 0.815 |
| Na | 0.001 | 0.003 | 0.130 | 1.001(0.996,1.007) | 0.719 |
| P | -0.251 | 0.108 | 5.379 | 0.778(0.629,0.962) | 0.020 |
| PCT | -0.397 | 0.457 | 0.754 | 0.672(0.275,1.647) | 0.385 |
| PDW | -0.083 | 0.063 | 1.738 | 0.921(0.814,1.041) | 0.187 |
| PLCR | 0.009 | 0.007 | 1.878 | 1.009(0.996,1.022) | 0.171 |
| ALP | -0.004 | 0.001 | 22.419 | 0.996(0.994,0.998) | 0.000 |
| PLT | -0.001 | 0.000 | 1.229 | 0.999(0.998,1.000) | 0.268 |
| PT | 0.510 | 0.069 | 54.529 | 1.666(1.455,1.908) | 0.000 |
| RBC | -0.105 | 0.111 | 0.891 | 0.900(0.724,1.120) | 0.345 |
| RDWCV | -0.152 | 0.047 | 10.301 | 0.859(0.783,0.943) | 0.001 |
| RDWSD | -0.059 | 0.016 | 13.393 | 0.943(0.913,0.973) | 0.000 |
| SAA | -0.001 | 0.001 | 0.732 | 0.999(0.998,1.001) | 0.392 |
| TBA | -0.016 | 0.008 | 4.071 | 0.984(0.969,1.000) | 0.044 |
| TBIL | -0.013 | 0.006 | 4.843 | 0.987(0.975,0.999) | 0.028 |
| TG | 0.090 | 0.107 | 0.708 | 1.094(0.887,1.350) | 0.400 |
| ALT | -0.010 | 0.004 | 5.318 | 0.990(0.981,0.998) | 0.021 |
| TP | 0.028 | 0.008 | 13.656 | 1.029(1.013,1.044) | 0.000 |
| TT | -0.239 | 0.056 | 17.945 | 0.788(0.705,0.880) | 0.000 |
| UA | 0.001 | 0.001 | 2.563 | 1.001(1.000,1.003) | 0.109 |
| Urea | -0.052 | 0.047 | 1.252 | 0.949(0.866,1.040) | 0.263 |
| NEUT% | 0.038 | 0.004 | 88.041 | 1.038(1.030,1.046) | 0.000 |
| LYM% | -0.041 | 0.004 | 93.175 | 0.960(0.952,0.968) | 0.000 |
| MONO% | -0.069 | 0.026 | 7.282 | 0.933(0.887,0.981) | 0.007 |
| EOS% | -0.026 | 0.031 | 0.711 | 0.974(0.916,1.036) | 0.399 |
| BASO% | 0.920 | 0.302 | 9.260 | 2.510(1.388,4.542) | 0.002 |
| NEUT count | 0.077 | 0.025 | 9.868 | 1.080(1.029,1.133) | 0.002 |
| AMY | 0.009 | 0.009 | 0.949 | 1.009(0.991,1.027) | 0.330 |
| LYM count | -0.302 | 0.039 | 59.711 | 0.739(0.685,0.798) | 0.000 |
| MONO count | -0.795 | 0.215 | 13.619 | 0.452(0.296,0.689) | 0.000 |
| Eos count | -0.695 | 0.364 | 3.641 | 0.499(0.244,1.019) | 0.056 |
| BASO count | 5.861 | 3.916 | 2.240 | 350.994(0.163,756617.257) | 0.135 |
| A/A | -0.088 | 0.069 | 1.626 | 0.916(0.800,1.048) | 0.202 |
| A/G | -1.288 | 0.199 | 41.946 | 0.276(0.187,0.407) | 0.000 |
| PT% | -0.045 | 0.006 | 53.770 | 0.956(0.944,0.967) | 0.000 |
| WBC | -0.054 | 0.019 | 8.273 | 0.947(0.913,0.983) | 0.004 |
| aHBDH | -0.006 | 0.001 | 30.102 | 0.994(0.992,0.996) | 0.000 |
| APOA | 0.352 | 0.163 | 4.690 | 1.422(1.034,1.956) | 0.030 |
| APOB | 0.522 | 0.246 | 4.504 | 1.686(1.041,2.731) | 0.034 |

*Note: p-values <0.05 indicate statistically significant differences.*


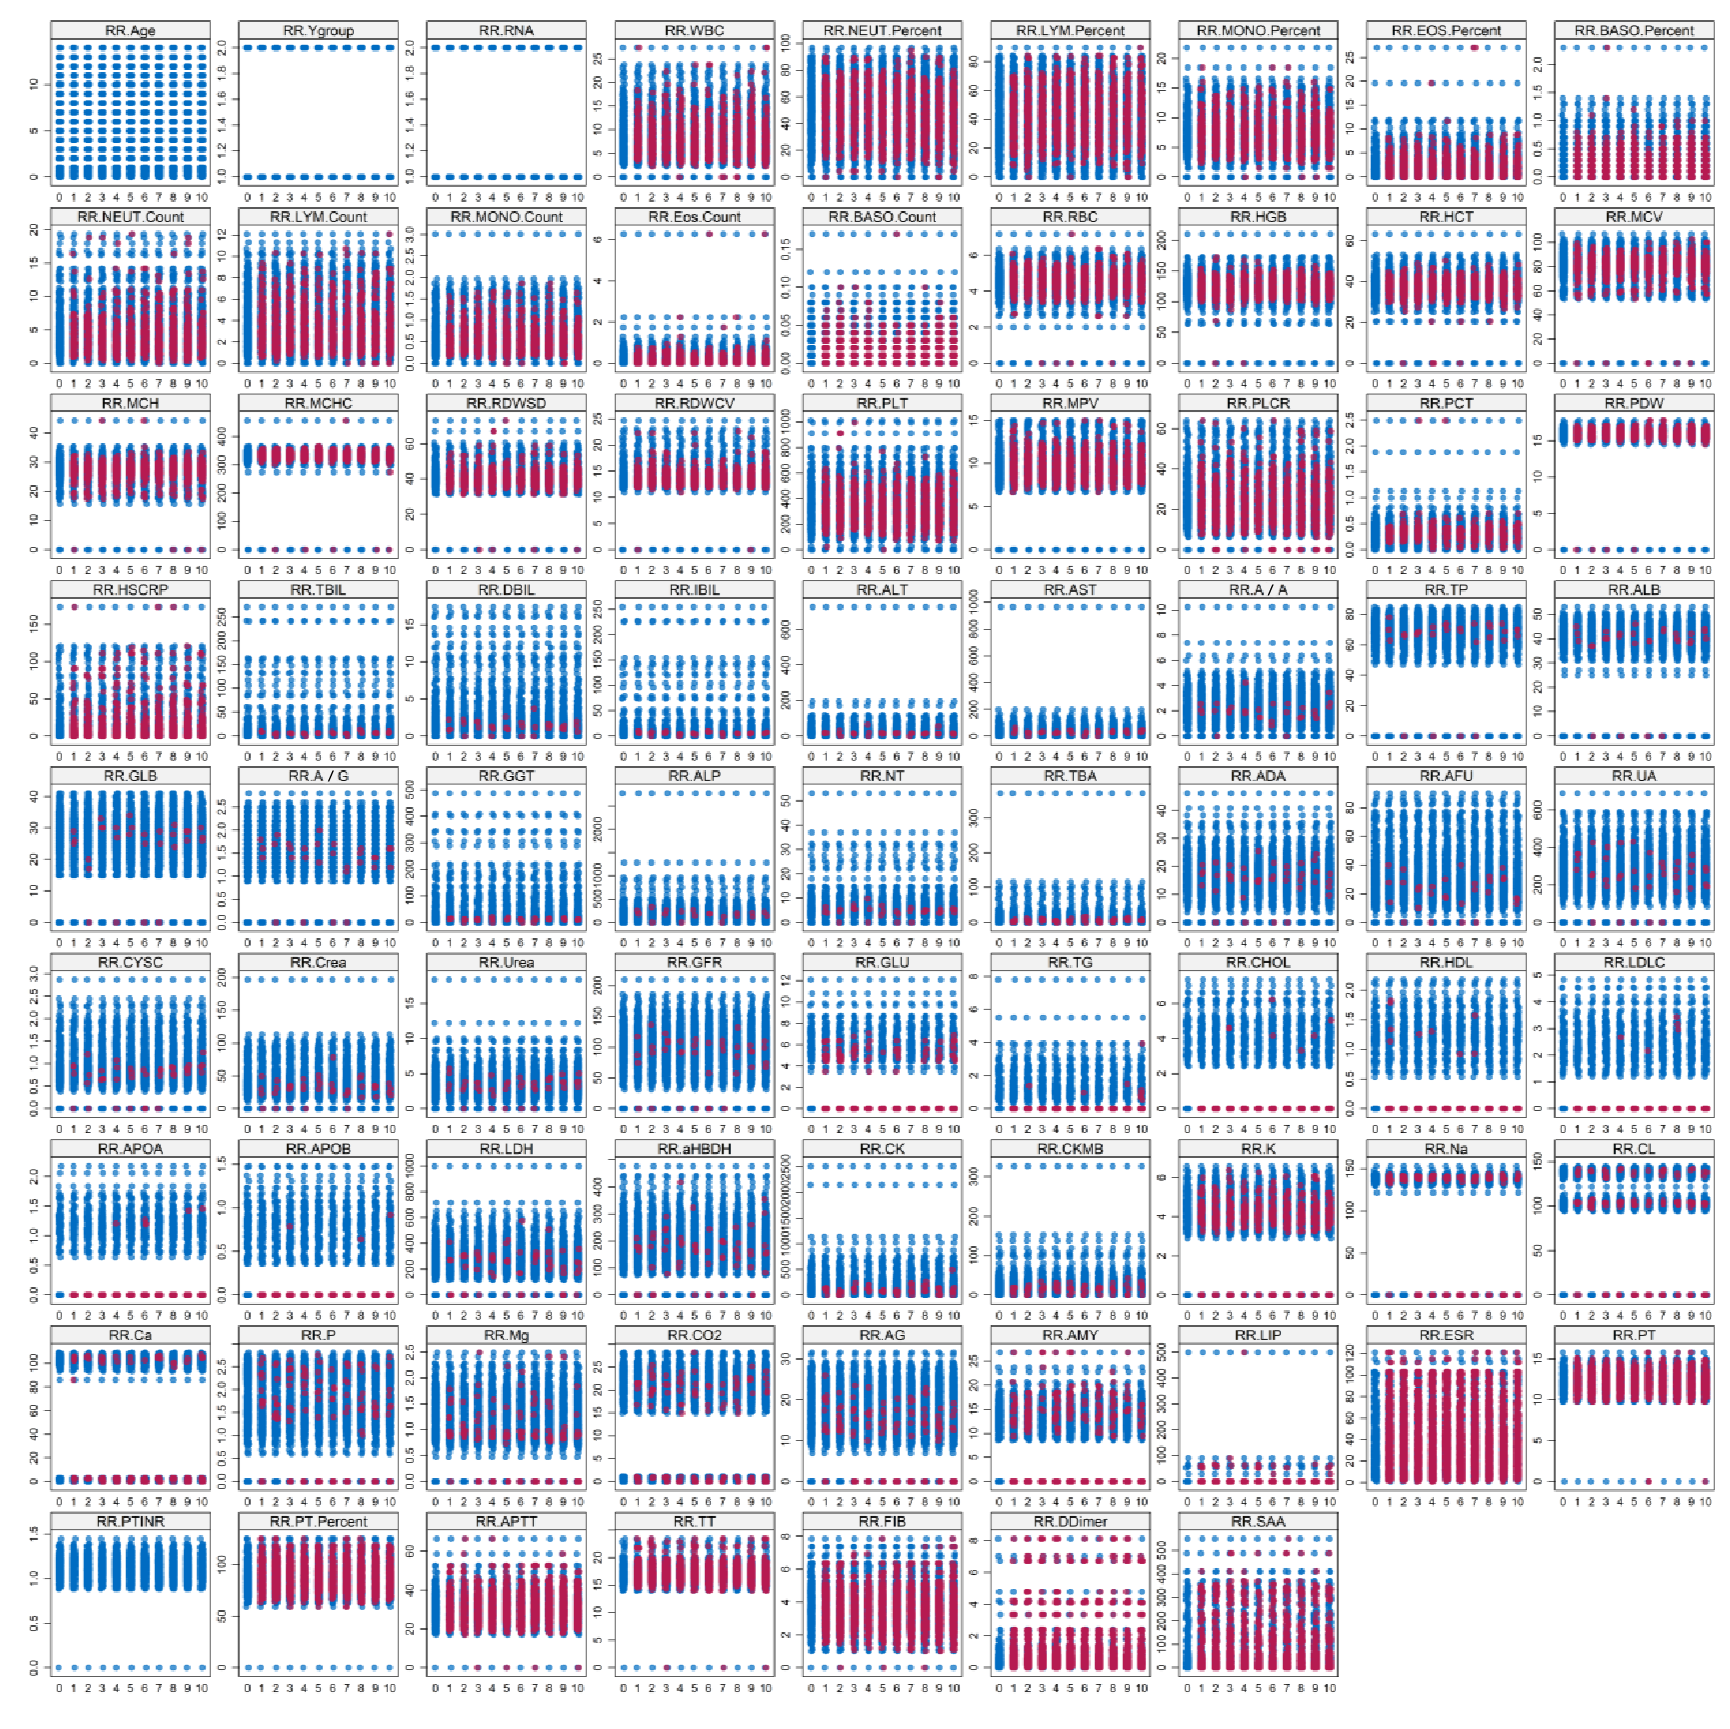


Supplementary Figure 1 Distribution of kernel density plots before and after the filling by Random Forests.
